# Supplementary material
Source: publisher site journal article supplement (https://www.spandidos-publications.com/2629/downloadSupplementary)
Supplement: Supplementary file 1 [file downloadSupplementary]

## Sheet: Table S6 DDX41_vs_Ctrl_IR_RAS_p
Table SVI. DDX41_vs_Ctrl_IR_RAS_p.
X.ID	Chr	Ass1	Ass2	Strand	Type	Isoform	KorN	Ctrl_1st.Ratio	Ctrl_1st.intron_ave_base	Ctrl_1st.ends_exon_ave_base	Ctrl_1st.isfiltered	Ctrl_2nd.Ratio	Ctrl_2nd.intron_ave_base	Ctrl_2nd.ends_exon_ave_base	Ctrl_2nd.isfiltered	DDX41_1st.Ratio	DDX41_1st.intron_ave_base	DDX41_1st.ends_exon_ave_base	DDX41_1st.isfiltered	DDX41_2nd.Ratio	DDX41_2nd.intron_ave_base	DDX41_2nd.ends_exon_ave_base	DDX41_2nd.isfiltered	P-value	T-value	DiffType	Gene	Symbol	Chr	GeneType	Description
known_IR_120	chr1	85318897	85321302	-	IntronR	ENST00000539042.3	known	1.49	32.52	21.9	y	1.42	31.01	21.81	y	2.05	39.63	19.32	y	1.98	41.43	20.97	y	0.00772212	11.3137	up	ENSG00000153904.18	DDAH1	chr1	protein_coding	dimethylarginine dimethylaminohydrolase 1
known_IR_124	chr1	86880689	86880693	-	IntronR	ENST00000611507.4	known	0.92	179.33	195.97	y	0.93	154.33	165.34	y	0.89	159.67	179.64	y	0.88	133.67	152.75	y	0.0298575	-5.65685	down	ENSG00000183291.15	2020-09-15	chr1	protein_coding		--
known_IR_145	chr10	31318540	31318896	-	IntronR	ENST00000441257.1	known	0.4	11.03	27.25	y	0.42	10.92	26.14	y	0.49	14.99	30.78	y	0.52	13.19	25.52	y	0.0454248	5.26965	up	ENSG00000237036.4	ZEB1-AS1	chr10	antisense	ZEB1 antisense RNA 1
known_IR_158	chr10	68936991	68936994	+	IntronR	ENST00000610822.1	known	0.83	144	173.99	y	0.85	156	182.67	y	0.95	150	157.33	y	0.98	165	169.12	y	0.0286201	6.93375	up	ENSG00000107625.12	DDX50	chr10	protein_coding	DEAD (Asp-Glu-Ala-Asp) box polypeptide 50
known_IR_165	chr10	73802576	73802674	-	IntronR	ENST00000299641.8	known	0.68	8.64	12.77	y	0.56	8.37	15.05	y	0.17	2.66	15.88	n	0.09	1.27	14.03	n	0.0296181	-6.79508	down	ENSG00000166507.16	NDST2	chr10	protein_coding	N-deacetylase/N-sulfotransferase (heparan glucosaminyl) 2
known_IR_203	chr11	2402652	2402845	+	IntronR	ENST00000380996.9	known	0.86	36.54	42.32	y	0.88	35.27	40.22	y	1.22	48.77	40.05	y	1.28	44.67	34.84	y	0.0324006	12.0167	up	ENSG00000184281.14	TSSC4	chr11	protein_coding	tumor suppressing subtransferable candidate 4
known_IR_445	chr14	77718286	77718367	-	IntronR	ENST00000261531.11	known	0.04	6.4	143.89	n	0.03	4.5	143.54	n	0.26	36.38	141.06	y	0.25	35.12	138.82	y	0.00103146	31.1127	up	ENSG00000100603.13	SNW1	chr14	protein_coding	SNW domain containing 1
known_IR_486	chr15	74782148	74782668	+	IntronR	ENST00000439220.6	known	0.64	17.54	27.58	y	0.57	23.14	40.56	y	0.36	11.57	32.5	y	0.32	16.9	52.46	y	0.0386351	-6.57384	down	ENSG00000103653.16	CSK	chr15	protein_coding	c-src tyrosine kinase
known_IR_498	chr15	84620772	84622646	+	IntronR	ENST00000485222.2	known	1.69	4.74	2.8	y	1.81	6.08	3.35	y	0.95	7.25	7.63	y	0.78	6.51	8.4	y	0.0184797	-8.50608	down	ENSG00000176371.13	ZSCAN2	chr15	protein_coding	zinc finger and SCAN domain containing 2
known_IR_527	chr16	21904540	21904919	-	IntronR	ENST00000523028.5	known	0	0	1.84	n	0.28	0.79	2.86	y	1.19	1.16	0.97	n	1.37	5.22	3.8	y	0.0307382	6.8496	up	ENSG00000185710.9	SMG1P4	chr16	transcribed_unprocessed_pseudogene	SMG1 pseudogene 4
known_IR_563	chr16	30223474	30224981	-	IntronR	ENST00000543463.1	known	2.15	6.03	2.8	y	2.2	6.96	3.16	y	1.47	6.34	4.32	y	1.49	5.7	3.83	y	0.00977969	-25.8117	down	ENSG00000198064.13	RP11-347C12.1	chr16	protein_coding		--
known_IR_635	chr17	19578128	19578744	+	IntronR	ENST00000395585.5	known	1.06	12.1	11.43	y	0.98	13.31	13.59	y	1.47	11.28	7.69	y	1.39	15.87	11.41	y	0.0185094	7.24784	up	ENSG00000142494.13	SLC47A1	chr17	protein_coding	solute carrier family 47 (multidrug and toxin extrusion), member 1
known_IR_690	chr17	58415962	58417017	-	IntronR	ENST00000407977.6	known	0.78	0.76	0.97	y	0.72	1.23	1.71	y	0.15	0.26	1.71	n	0.22	0.37	1.7	n	0.00717942	-12.2566	down	ENSG00000108375.12	RNF43	chr17	protein_coding	ring finger protein 43
known_IR_951	chr2	175114774	175114780	-	IntronR	ENST00000538946.5	known	0.95	51	53.83	y	0.98	44.4	45.11	y	1.09	37.4	34.17	y	1.06	43.8	41.17	y	0.0352362	5.18545	up	ENSG00000115966.16	ATF2	chr2	protein_coding	activating transcription factor 2
known_IR_952	chr2	176130483	176130796	+	IntronR	ENST00000544999.2	known	2.69	0.69	0.26	y	2.6	1.32	0.51	n	0.15	0.15	0.97	n	0.48	0.92	1.92	n	0.0328251	-13.6236	down	ENSG00000175879.8	HOXD8	chr2	protein_coding	homeobox D8
known_IR_985	chr2	26389067	26389071	+	IntronR	ENST00000613142.4	known	1.78	124	69.79	y	1.6	113.33	70.7	y	1.03	77	74.57	y	1.13	80	70.51	y	0.0469764	-5.92484	down	ENSG00000138018.17	EPT1	chr2	protein_coding	ethanolaminephosphotransferase 1
known_IR_1008	chr2	74464987	74465314	-	IntronR	ENST00000452063.6	known	1.37	34.51	25.17	y	1.45	29.28	20.17	y	2.02	30.91	15.28	y	1.97	30.52	15.46	y	0.011988	12.402	up	ENSG00000115275.11	MOGS	chr2	protein_coding	mannosyl-oligosaccharide glucosidase
known_IR_1045	chr20	44932432	44933072	+	IntronR	ENST00000255136.7	known	2.32	22.53	9.7	y	2.28	23.76	10.41	y	1.2	16.18	13.49	y	1.22	24.22	19.8	y	0.00245021	-48.7463	down	ENSG00000101104.12	PABPC1L	chr20	protein_coding	poly(A) binding protein, cytoplasmic 1-like
known_IR_1166	chr3	195708268	195708429	+	IntronR	ENST00000626007.2	known	0.17	0.32	1.93	n	0	0	4	n	1.52	1.21	0.8	n	1.37	3.81	2.78	y	0.00727486	11.9974	up	ENSG00000242086.8	LINC00969	chr3	lincRNA	long intergenic non-protein coding RNA 969
known_IR_1335	chr6	152330993	152331348	-	IntronR	ENST00000341594.9	known	0.79	10.85	13.76	y	0.61	9.97	16.27	y	1.25	14.8	11.8	y	1.41	17.03	12.06	y	0.0356579	5.23187	up	ENSG00000131018.22	SYNE1	chr6	protein_coding	spectrin repeat containing, nuclear envelope 1
known_IR_1537	chr9	35605425	35605474	+	IntronR	ENST00000620767.4	known	1.93	5	2.59	y	1.86	9.5	5.11	y	0	0	2.87	n	0.29	1.4	4.85	n	0.0417482	-11.732	down	ENSG00000107140.15	TESK1	chr9	protein_coding	testis-specific kinase 1
known_IR_1553	chr9	40325730	40326318	+	IntronR	ENST00000593047.5	known	10.29	0.49	0.05	n	9.04	1	0.11	n	1	0.25	0	n	0.86	1.17	1.37	y	0.0430474	-13.8892	down	ENSG00000223839.7	FAM95B1	chr9	lincRNA	family with sequence similarity 95, member B1
known_IR_1574	chrX	135985477	135985603	+	IntronR	ENST00000370701.5	known	1.07	11.84	11.03	y	1.2	9.62	7.98	y	0.52	6.26	11.99	y	0.33	6.14	18.56	y	0.0337514	-6.16809	down	ENSG00000198689.9	SLC9A6	chrX	protein_coding	solute carrier family 9, subfamily A (NHE6, cation proton antiporter 6), member 6
known_IR_1589	chrX	154030955	154030958	-	IntronR	ENST00000622433.4	known	1.42	88.5	62.49	y	1.33	80	60.31	y	1.08	73	67.38	n	0.96	64.5	67.37	n	0.0483384	-4.73333	down	ENSG00000169057.19	MECP2	chrX	protein_coding	methyl CpG binding protein 2
novel_IR_35	chr1	108696194	108696277	+	IntronR	ENST00000370022.9	novel	0.03	3.73	126.9	n	0.1	10.11	106.4	n	0.34	51.49	150.41	y	0.42	66.43	157.44	n	0.0284447	5.92654	up	ENSG00000134186.11	PRPF38B	chr1	protein_coding	pre-mRNA processing factor 38B
novel_IR_36	chr1	108696194	108696277	+	IntronR	ENST00000370025.8	novel	0.03	3.73	126.9	n	0.1	10.11	106.4	n	0.34	51.49	150.41	n	0.42	66.43	157.44	y	0.0284447	5.92654	up	ENSG00000134186.11	PRPF38B	chr1	protein_coding	pre-mRNA processing factor 38B
novel_IR_82	chr1	110894401	110894960	+	IntronR	ENST00000271324.5	novel	0.14	0.33	2.46	n	0.12	0.26	2.23	n	0.25	0.26	1.05	n	0.23	1.63	7.1	y	0.0161301	7.77817	up	ENSG00000143119.12	CD53	chr1	protein_coding	CD53 molecule
novel_IR_147	chr1	117959003	117959292	+	IntronR	ENST00000349139.5	novel	0.27	4.24	15.86	y	0.23	3.84	16.94	y	0.13	2.19	17.28	n	0.1	1.54	15.8	n	0.0383286	-5.4	down	ENSG00000065183.15	WDR3	chr1	protein_coding	WD repeat domain 3
novel_IR_317	chr1	149930547	149930792	-	IntronR	ENST00000439741.2	novel	0.13	7.69	57.51	n	0.1	5.21	49.64	n	0.23	9.11	38.93	n	0.27	12.31	45.32	y	0.0383286	5.4	up	ENSG00000014914.19	MTMR11	chr1	protein_coding	myotubularin related protein 11
novel_IR_417	chr1	154553672	154554650	+	IntronR	ENST00000441613.1	novel	0.05	1.35	27.4	n	0.02	0.53	26.72	n	0.2	4.33	21.39	y	0.24	7.45	30.74	y	0.0217889	7.4	up	ENSG00000229780.1	UBE2Q1-AS1	chr1	antisense	UBE2Q1 antisense RNA 1
novel_IR_435	chr1	155045992	155046125	+	IntronR	ENST00000295542.5	novel	1.96	17.98	9.17	y	1.87	20.73	11.11	y	1.32	16.41	12.41	y	1.37	6.97	5.07	y	0.0179811	-11.0727	down	ENSG00000163357.10	DCST1	chr1	protein_coding	DC-STAMP domain containing 1
novel_IR_442	chr1	155053923	155057199	+	IntronR	ENST00000368413.5	novel	0.36	76.13	210.47	y	0.37	72.12	196.29	y	0.43	79.41	183.57	y	0.44	84.16	191.98	y	0.0100505	9.89949	up	ENSG00000143537.13	ADAM15	chr1	protein_coding	ADAM metallopeptidase domain 15
novel_IR_476	chr1	155613733	155614059	+	IntronR	ENST00000368341.8	novel	0.4	6.4	16	y	0.33	5.77	17.34	n	0.13	2.15	16.78	n	0.18	2.86	15.65	n	0.0479901	-4.8824	down	ENSG00000125459.14	MSTO1	chr1	protein_coding	misato 1, mitochondrial distribution and morphology regulator
novel_IR_492	chr1	155991510	156001508	+	IntronR	ENST00000415726.1	novel	2.13	0.46	0.21	y	2.11	0.56	0.26	y	0.42	0.44	1.05	y	0.48	0.72	1.51	y	0.00534497	-52.81	down	ENSG00000224276.1	RP11-336K24.5	chr1	antisense		--
novel_IR_679	chr1	169855957	169859041	-	IntronR	ENST00000367770.5	novel	0.3	3.41	11.38	y	0.24	2.95	12.23	y	0.46	3.86	8.39	y	0.53	4.86	9.24	y	0.0413583	4.88094	up	ENSG00000000457.13	SCYL3	chr1	protein_coding	SCY1-like 3 (S. cerevisiae)
novel_IR_716	chr1	178852953	178853594	-	IntronR	ENST00000234816.6	novel	0.09	0.13	1.36	n	0	0	0.62	n	1	0.69	0	n	1.15	1.31	1.14	y	0.0141351	11.7762	up	ENSG00000116194.12	ANGPTL1	chr1	protein_coding	angiopoietin-like 1
novel_IR_758	chr1	186388548	186389588	+	IntronR	ENST00000367470.7	novel	0.13	5.45	42.2	n	0.16	7.41	46.1	n	0.24	7.46	31.05	y	0.27	8.85	32.82	y	0.0352362	5.18545	up	ENSG00000157181.14	C1orf27	chr1	protein_coding	chromosome 1 open reading frame 27
novel_IR_808	chr1	202602057	202602378	-	IntronR	ENST00000367267.5	novel	0	0	0.21	n	0.14	0.14	1.04	n	1.32	0.26	0.19	n	1.58	1.41	0.9	y	0.0245815	9.34654	up	ENSG00000143858.11	SYT2	chr1	protein_coding	synaptotagmin II
novel_IR_831	chr1	205523297	205523483	+	IntronR	ENST00000429964.6	novel	0.41	22.14	54.18	y	0.39	22.08	56.94	y	0.26	15.78	61.53	y	0.22	12.58	58.19	y	0.0405833	-7.15542	down	ENSG00000117266.15	CDK18	chr1	protein_coding	cyclin-dependent kinase 18
novel_IR_1214	chr1	3506236	3507795	-	IntronR	ENST00000294599.8	novel	0.28	27.28	97.94	y	0.3	28.28	93.3	y	0.37	30.18	81.17	y	0.38	30.69	79.91	y	0.037184	7.60263	up	ENSG00000162591.15	MEGF6	chr1	protein_coding	multiple EGF-like-domains 6
novel_IR_1260	chr1	39563741	39564423	-	IntronR	ENST00000372856.7	novel	0.23	54.64	234.8	y	0.24	49.52	204.91	y	0.29	66.8	226.44	y	0.28	62.22	221.69	y	0.0194193	7.07107	up	ENSG00000090621.13	PABPC4	chr1	protein_coding	poly(A) binding protein, cytoplasmic 4 (inducible form)
novel_IR_1262	chr1	39841913	39844101	-	IntronR	ENST00000537440.5	novel	0.22	16.71	76.03	y	0.19	15.13	79.32	n	0.31	25.15	80.46	y	0.33	28.19	86.72	y	0.0329611	6.37905	up	ENSG00000043514.15	TRIT1	chr1	protein_coding	tRNA isopentenyltransferase 1
novel_IR_1299	chr1	43433190	43434386	+	IntronR	ENST00000562955.1	novel	0.16	4.69	29.43	n	0.18	4.38	23.82	n	0.29	4.56	15.65	y	0.27	4.68	17.21	y	0.0161301	7.77817	up	ENSG00000198198.13	SZT2	chr1	protein_coding	seizure threshold 2 homolog (mouse)
novel_IR_1341	chr1	45333170	45333285	-	IntronR	ENST00000372104.5	novel	0.24	6.57	27.58	y	0.21	5.23	25.04	n	0.08	2.3	27.12	n	0.05	0.86	18.96	n	0.0171278	-7.54247	down	ENSG00000132781.17	MUTYH	chr1	protein_coding	mutY homolog
novel_IR_1367	chr1	46409198	46410398	+	IntronR	ENST00000243167.8	novel	1.77	1.04	0.59	y	1.74	0.73	0.42	n	0.99	0.5	0.51	y	1	0.25	0	n	0.00599478	-48.0666	down	ENSG00000117480.15	FAAH	chr1	protein_coding	fatty acid amide hydrolase
novel_IR_1375	chr1	46663923	46665256	-	IntronR	ENST00000542495.5	novel	0.24	1.92	7.87	y	0.22	1.81	8.12	y	0.29	2.24	7.77	y	0.31	2.94	9.48	y	0.0384761	4.94975	up	ENSG00000123472.12	ATPAF1	chr1	protein_coding	ATP synthase mitochondrial F1 complex assembly factor 1
novel_IR_1419	chr1	53304625	53304997	+	IntronR	ENST00000446686.1	novel	0.79	0.91	1.14	n	0.02	0.02	0.99	n	9.49	0.74	0.08	y	10.18	0.4	0.04	n	0.00315565	18.2412	up	ENSG00000232762.1	RP4-784A16.4	chr1	antisense		--
novel_IR_1452	chr1	6129069	6130204	-	IntronR	ENST00000262450.7	novel	1.24	2.23	1.8	y	1.45	2.11	1.46	y	0.28	1.16	4.07	y	0.22	0.76	3.38	n	0.0452489	-10.0273	down	ENSG00000116254.17	CHD5	chr1	protein_coding	chromodomain helicase DNA binding protein 5
novel_IR_1479	chr1	6467572	6467825	-	IntronR	ENST00000535355.5	novel	0.25	3.26	13.2	y	0.2	2.69	13.47	n	0.07	0.64	9.22	n	0.04	0.42	11.11	n	0.0437537	-5.83095	down	ENSG00000171680.20	PLEKHG5	chr1	protein_coding	pleckstrin homology domain containing, family G (with RhoGef domain) member 5
novel_IR_1627	chr10	100490322	100490706	-	IntronR	ENST00000370345.7	novel	0.09	1.04	12.05	n	0.16	1.37	8.66	n	0.87	4.94	5.68	y	0.71	4.62	6.54	y	0.0437083	7.61556	up	ENSG00000075826.16	SEC31B	chr10	protein_coding	SEC31 homolog B (S. cerevisiae)
novel_IR_1715	chr10	110006081	110008181	-	IntronR	ENST00000625954.2	novel	0.48	0.2	0.4	y	0.44	0.33	0.74	y	1.03	0.56	0.54	y	0.99	0.37	0.37	y	0.00263418	19.4454	up	ENSG00000203876.9	ADD3-AS1	chr10	processed_transcript	ADD3 antisense RNA 1
novel_IR_1779	chr10	123136450	123137058	+	IntronR	ENST00000357878.5	novel	0.1	1.99	19.05	n	0.19	2.85	15.31	n	0.45	6.64	14.8	y	0.55	7.42	13.54	y	0.034884	5.27739	up	ENSG00000188620.9	HMX3	chr10	protein_coding	H6 family homeobox 3
novel_IR_2008	chr10	68073686	68075144	-	IntronR	ENST00000412272.6	novel	0.22	21.86	97.27	y	0.24	23.93	101.71	y	0.33	25.12	76.82	y	0.34	34.02	98.71	y	0.0273751	9.39149	up	ENSG00000148634.15	HERC4	chr10	protein_coding	HECT and RLD domain containing E3 ubiquitin protein ligase 4
novel_IR_2234	chr11	108169852	108169928	-	IntronR	ENST00000278612.8	novel	0.05	4.12	88.59	n	0.06	4.6	73.24	n	0.36	27.01	74.28	y	0.33	23.72	72.27	y	0.0193853	18.3412	up	ENSG00000149308.16	NPAT	chr11	protein_coding	nuclear protein, ataxia-telangiectasia locus
novel_IR_2252	chr11	113690373	113690841	-	IntronR	ENST00000536856.5	novel	3.91	4.02	1.03	y	4.48	0.63	0.14	n	0.62	1.26	2.05	y	0.44	0.57	1.29	y	0.0331776	-12.2627	down	ENSG00000166682.10	TMPRSS5	chr11	protein_coding	transmembrane protease, serine 5
novel_IR_2264	chr11	117163874	117174893	+	IntronR	ENST00000419197.6	novel	3.74	39.96	10.68	y	3.75	39.75	10.6	y	4.16	44.96	10.8	y	4.14	48.43	11.71	y	0.0037906	36.2243	up	ENSG00000168092.13	PAFAH1B2	chr11	protein_coding	platelet-activating factor acetylhydrolase 1b, catalytic subunit 2 (30kDa)
novel_IR_2407	chr11	134364398	134367257	+	IntronR	ENST00000339772.9	novel	0.13	4.4	33.19	n	0.14	5.81	42.38	n	0.22	5.2	23.64	y	0.2	7.62	38.91	n	0.0445338	6.7082	up	ENSG00000149328.14	GLB1L2	chr11	protein_coding	galactosidase, beta 1-like 2
novel_IR_2445	chr11	19224980	19252245	+	IntronR	ENST00000527978.1	novel	1.68	2.25	1.34	n	1.58	2.48	1.57	y	0.93	2.05	2.21	y	0.97	2.82	2.91	y	0.0249157	-12.6273	down	ENSG00000255308.1	RP11-428C19.4	chr11	antisense		--
novel_IR_2482	chr11	313691	314164	+	IntronR	ENST00000528780.5	novel	0.58	5.81	9.98	n	0.57	3.22	5.7	n	1.08	7.04	6.53	y	1.06	7.22	6.84	y	0.00282248	44.2741	up	ENSG00000185885.15	IFITM1	chr11	protein_coding	interferon induced transmembrane protein 1
novel_IR_2530	chr11	432054	433314	-	IntronR	ENST00000332826.6	novel	0.2	2.73	13.49	y	0.21	1.28	6.17	n	0.25	1.65	6.56	y	0.26	1.22	4.63	n	0.0194193	7.07107	up	ENSG00000185101.12	ANO9	chr11	protein_coding	anoctamin 9
novel_IR_2646	chr11	61281235	61281786	-	IntronR	ENST00000613271.4	novel	1.04	0.27	0.26	n	0.87	1.44	1.67	y	0.29	0.81	2.83	y	0.21	0.26	1.28	n	0.0409246	-7.50467	down	ENSG00000167992.12	VWCE	chr11	protein_coding	von Willebrand factor C and EGF domains
novel_IR_2662	chr11	61636354	61636585	+	IntronR	ENST00000496593.5	novel	2.02	3.53	1.75	y	1.78	4.36	2.44	y	0.18	0.36	1.98	n	0.4	1.28	3.21	n	0.0103218	-9.89015	down	ENSG00000243742.5	RPLP0P2	chr11	transcribed_processed_pseudogene	ribosomal protein, large, P0 pseudogene 2
novel_IR_2719	chr11	63999404	63999530	-	IntronR	ENST00000255681.6	novel	0.1	2.62	25.1	n	0.14	2.25	15.59	n	0.31	7.27	23.21	y	0.26	7.38	28.73	y	0.0392905	5.15373	up	ENSG00000133315.10	MACROD1	chr11	protein_coding	MACRO domain containing 1
novel_IR_2742	chr11	6449446	6450551	-	IntronR	ENST00000525074.5	novel	0.61	11.48	18.94	y	0.66	13.2	19.96	y	0.38	11.22	29.19	y	0.4	11.16	28.09	y	0.0381672	-9.09907	down	ENSG00000110171.18	TRIM3	chr11	protein_coding	tripartite motif containing 3
novel_IR_2776	chr11	65083723	65083933	-	IntronR	ENST00000275517.7	novel	0.23	11.21	48.9	n	0.27	9.71	35.39	n	0.64	25.81	40.56	y	0.61	27.64	45.44	y	0.00597906	15	up	ENSG00000146670.9	CDCA5	chr11	protein_coding	cell division cycle associated 5
novel_IR_2817	chr11	65780342	65780442	-	IntronR	ENST00000532090.2	novel	0.11	3.51	31.15	n	0.08	2.12	27.71	n	0.23	6.82	29.3	y	0.25	7.57	30.38	y	0.0222268	8.04315	up	ENSG00000254470.2	AP5B1	chr11	protein_coding	adaptor-related protein complex 5, beta 1 subunit
novel_IR_2966	chr11	73969322	73969961	+	IntronR	ENST00000339764.5	novel	0.58	1.46	2.52	n	0.84	3.8	4.51	y	2.22	3.54	1.59	y	1.9	5.41	2.85	y	0.0249679	6.54846	up	ENSG00000187726.8	DNAJB13	chr11	protein_coding	DnaJ (Hsp40) homolog, subfamily B, member 13
novel_IR_2972	chr11	74843453	74844168	-	IntronR	ENST00000527087.5	novel	0.44	6.41	14.71	y	0.51	7.19	14.02	y	0.75	7.76	10.3	y	0.84	8.41	10	y	0.0345124	5.61317	up	ENSG00000166435.15	XRRA1	chr11	protein_coding	X-ray radiation resistance associated 1
novel_IR_2978	chr11	75260362	75260756	+	IntronR	ENST00000529215.1	novel	1.31	46.41	35.43	y	1.2	38.59	32.14	y	1.71	43.27	25.27	y	1.76	40.75	23.22	y	0.0394531	7.94502	up	ENSG00000254429.1	CTD-2562J17.7	chr11	antisense		--
novel_IR_2982	chr11	75449983	75450393	-	IntronR	ENST00000526177.5	novel	0.55	3.28	5.98	y	0.53	4.14	7.86	y	0.15	1.12	7.61	n	0.2	1.73	8.75	n	0.0227122	-13.5558	down	ENSG00000158555.14	GDPD5	chr11	protein_coding	glycerophosphodiester phosphodiesterase domain containing 5
novel_IR_3016	chr11	7995367	7995945	+	IntronR	ENST00000533626.5	novel	0.04	0.98	27.01	n	0.03	0.81	26.43	n	0.18	5.11	28	n	0.21	6.13	29.39	y	0.0398973	10.1193	up	ENSG00000175390.12	EIF3F	chr11	protein_coding	eukaryotic translation initiation factor 3, subunit F
novel_IR_3099	chr12	103763608	103766286	+	IntronR	ENST00000388887.6	novel	0.06	0.11	1.81	n	0.2	0.25	1.27	n	1.46	0.38	0.26	n	1.23	0.8	0.65	y	0.0212332	9.02479	up	ENSG00000136011.14	STAB2	chr12	protein_coding	stabilin 2
novel_IR_3197	chr12	120722014	120723579	-	IntronR	ENST00000544939.1	novel	1.29	33.36	25.9	y	1.17	35.83	30.68	y	0.83	28.11	33.92	y	0.69	28.78	41.67	y	0.038166	-5.09787	down	ENSG00000256569.1	RP11-173P15.5	chr12	antisense		--
novel_IR_3213	chr12	121797872	121801763	+	IntronR	ENST00000609067.1	novel	1.03	5.79	5.64	y	0.94	5.87	6.28	y	0.57	6.13	10.76	y	0.53	7.18	13.54	y	0.0350835	-8.83351	down	ENSG00000272849.1	RP11-347I19.8	chr12	lincRNA		--
novel_IR_3235	chr12	122777683	122781164	+	IntronR	ENST00000253079.10	novel	0.19	1.05	5.62	n	0.26	1.5	5.71	y	0.52	1.56	2.98	y	0.45	1.96	4.39	y	0.0343842	5.25279	up	ENSG00000130783.13	CCDC62	chr12	protein_coding	coiled-coil domain containing 62
novel_IR_3572	chr12	54407506	54409550	+	IntronR	ENST00000552785.1	novel	1.77	142.84	80.79	y	1.79	139.37	77.69	y	2.05	123.4	60.34	y	2.08	157.26	75.68	y	0.00693444	15.809	up	ENSG00000258086.1	RP11-753H16.5	chr12	antisense		--
novel_IR_3588	chr12	55838007	55838606	-	IntronR	ENST00000322569.8	novel	0.4	1.16	2.88	n	0.54	1.1	2.02	y	0.12	0.18	1.5	n	0	0	2.04	n	0.0490518	-4.44707	down	ENSG00000123342.15	MMP19	chr12	protein_coding	matrix metallopeptidase 19
novel_IR_3614	chr12	56096622	56096748	+	IntronR	ENST00000553131.5	novel	0.24	0.74	3.08	n	0.19	0.69	3.62	n	0.48	1.62	3.34	y	0.42	1	2.37	n	0.0285923	6.01773	up	ENSG00000065361.14	ERBB3	chr12	protein_coding	erb-b2 receptor tyrosine kinase 3
novel_IR_3693	chr12	57631086	57631915	-	IntronR	ENST00000418555.6	novel	0.41	10.52	25.65	y	0.43	11.13	25.9	n	0.51	9.21	18.12	n	0.5	8.33	16.5	n	0.037184	7.60263	up	ENSG00000135454.13	B4GALNT1	chr12	protein_coding	beta-1,4-N-acetyl-galactosaminyl transferase 1
novel_IR_3888	chr12	8092784	8092872	+	IntronR	ENST00000339754.9	novel	0.16	5.2	33.47	n	0.09	4.31	45.66	n	0.36	20.82	57.84	y	0.44	20.56	46.6	y	0.0366988	5.17396	up	ENSG00000089818.16	NECAP1	chr12	protein_coding	NECAP endocytosis associated 1
novel_IR_3964	chr12	95057878	95058310	-	IntronR	ENST00000333003.9	novel	0.3	10.3	34.17	y	0.26	11.47	44.73	y	0.41	14.08	34.72	y	0.46	18.89	41.1	y	0.0439884	4.84139	up	ENSG00000120798.16	NR2C1	chr12	protein_coding	nuclear receptor subfamily 2, group C, member 1
novel_IR_3975	chr12	95878346	95879644	-	IntronR	ENST00000344280.7	novel	10.59	1.36	0.13	n	10.74	0.9	0.08	n	0.81	0.68	0.84	n	0.85	1.68	1.98	y	0.00261936	-126.706	down	ENSG00000165972.12	CCDC38	chr12	protein_coding	coiled-coil domain containing 38
novel_IR_4018	chr13	110637249	110638242	+	IntronR	ENST00000309957.2	novel	0.33	14.06	42.83	y	0.32	11.8	36.48	y	0.42	14.73	35.07	y	0.44	16.17	36.49	y	0.0273751	9.39149	up	ENSG00000213995.11	CARKD	chr13	protein_coding	carbohydrate kinase domain containing
novel_IR_4028	chr13	113001983	113014763	+	IntronR	ENST00000375597.8	novel	0.49	1.53	3.11	y	3.04	1.35	0.45	y	18.03	1.03	0.06	y	14.39	1.24	0.09	n	0.0299211	6.50041	up	ENSG00000126217.20	MCF2L	chr13	protein_coding	MCF.2 cell line derived transforming sequence-like
novel_IR_4029	chr13	113014846	113024644	+	IntronR	ENST00000375608.7	novel	0.33	1.62	4.91	y	1.32	1.27	0.96	y	12.43	1.12	0.09	n	12.41	1.68	0.14	y	0.0271013	23.4195	up	ENSG00000126217.20	MCF2L	chr13	protein_coding	MCF.2 cell line derived transforming sequence-like
novel_IR_4232	chr14	100545066	100546501	-	IntronR	ENST00000556751.5	novel	0.8	17.5	21.89	y	0.83	17.29	20.82	n	0.68	18.67	27.49	y	0.71	21.49	30.1	y	0.0298575	-5.65685	down	ENSG00000183092.15	BEGAIN	chr14	protein_coding	brain-enriched guanylate kinase-associated
novel_IR_4253	chr14	103335932	103336036	+	IntronR	ENST00000558506.1	novel	0.21	24.75	119.88	y	0.2	24.12	122.17	n	0.15	20.38	139.79	n	0.14	20.57	150.9	n	0.0136061	-8.48528	down	ENSG00000100664.10	EIF5	chr14	protein_coding	eukaryotic translation initiation factor 5
novel_IR_4306	chr14	20996330	20996832	-	IntronR	ENST00000557335.1	novel	2.24	50	22.3	y	2.17	54.18	24.99	y	1.76	44.55	25.26	y	1.67	47.31	28.25	y	0.0158152	-8.59517	down	ENSG00000258471.1	RP11-84C10.4	chr14	antisense		--
novel_IR_4438	chr14	36519679	36521644	+	IntronR	ENST00000521292.2	novel	2.13	2.06	0.97	y	2.34	1.82	0.78	y	0.84	0.56	0.67	n	0.79	1.78	2.25	y	0.0370266	-13.156	down	ENSG00000253563.2	NKX2-1-AS1	chr14	antisense	NKX2-1 antisense RNA 1
novel_IR_4512	chr14	61537906	61545094	-	IntronR	ENST00000556543.1	novel	10.24	1.29	0.13	y	8.95	1.39	0.16	n	1.08	2	1.84	y	1.47	2.17	1.48	n	0.0341058	-12.3473	down	ENSG00000258926.1	RP11-47I22.1	chr14	antisense		--
novel_IR_4564	chr14	70524933	70534797	-	IntronR	ENST00000256389.3	novel	0.33	0.1	0.31	n	0.51	0.15	0.3	y	1.24	0.22	0.18	y	1	0.18	0	n	0.0495516	4.66667	up	ENSG00000134007.3	ADAM20	chr14	protein_coding	ADAM metallopeptidase domain 20
novel_IR_4767	chr15	37099429	37099801	+	IntronR	ENST00000559509.1	novel	2.3	7.55	3.28	y	2.36	5.79	2.46	n	0.77	3.94	5.13	y	0.54	2.87	5.31	y	0.0325223	-14.0936	down	ENSG00000259460.1	RP11-128A17.1	chr15	antisense		--
novel_IR_4900	chr15	43774518	43774596	-	IntronR	ENST00000319359.7	novel	0	0	0.33	n	0.26	2.82	10.88	y	1.53	11.01	7.2	y	1.4	13.84	9.86	y	0.0282735	9.18508	up	ENSG00000128886.11	ELL3	chr15	protein_coding	elongation factor RNA polymerase II-like 3
novel_IR_4907	chr15	43800784	43801518	+	IntronR	ENST00000458412.1	novel	0.47	44.6	94.01	y	0.46	38.8	83.48	y	0.52	43.91	84.55	y	0.51	38.54	75.94	y	0.0194193	7.07107	up	ENSG00000242028.5	HYPK	chr15	protein_coding	huntingtin interacting protein K
novel_IR_4935	chr15	45151248	45151874	+	IntronR	ENST00000321429.8	novel	3.82	1.88	0.49	y	3.09	1.22	0.4	n	1.14	1.04	0.91	y	0.55	0.37	0.68	n	0.0339132	-5.56138	down	ENSG00000137857.17	DUOX1	chr15	protein_coding	dual oxidase 1
novel_IR_4949	chr15	47765056	47765869	+	IntronR	ENST00000558014.5	novel	0.07	0.2	2.62	n	0.12	0.4	3.38	n	0.33	0.96	2.92	y	0.35	1.09	3.09	n	0.0381672	9.09907	up	ENSG00000137872.15	SEMA6D	chr15	protein_coding	sema domain, transmembrane domain (TM), and cytoplasmic domain, (semaphorin) 6D
novel_IR_4965	chr15	50497361	50497640	-	IntronR	ENST00000560380.1	novel	0	0	11.03	n	0.04	0.5	12.41	n	0.3	4.44	14.7	y	0.33	5.87	18.04	n	0.00929821	11.8	up	ENSG00000259298.1	RP11-562A8.4	chr15	antisense		--
novel_IR_4978	chr15	52057255	52100470	-	IntronR	ENST00000558607.1	novel	5.38	11.07	2.06	n	6.37	11.57	1.82	y	2.35	10.64	4.53	n	1.67	11.69	7.01	y	0.0312231	-6.43608	down	ENSG00000259712.1	CTD-2184D3.5	chr15	antisense		--
novel_IR_5097	chr15	70573431	70585875	-	IntronR	ENST00000630447.1	novel	0.41	0.22	0.55	n	0.4	0.13	0.32	n	0.68	0.09	0.14	n	0.66	0.18	0.27	y	0.00706748	23.7023	up	ENSG00000280639.1	RP11-96C21.2	chr15	lincRNA		--
novel_IR_5118	chr15	72756447	72760407	-	IntronR	ENST00000311669.12	novel	0.13	12.64	96.79	n	0.15	12.46	80.62	n	0.22	16.31	74.77	y	0.2	19.06	96.94	n	0.0384761	4.94975	up	ENSG00000159322.17	ADPGK	chr15	protein_coding	ADP-dependent glucokinase
novel_IR_5293	chr15	90905508	90905579	+	IntronR	ENST00000559717.5	novel	0.27	8.6	31.8	y	0.21	9.13	43.48	y	0.04	1.51	39.51	n	0	0	37.33	n	0.0355285	-6.1017	down	ENSG00000196547.14	MAN2A2	chr15	protein_coding	mannosidase, alpha, class 2A, member 2
novel_IR_5337	chr15	99395393	99396486	-	IntronR	ENST00000561362.1	novel	4.25	0.89	0.21	y	3.56	1.86	0.52	y	1	0.66	0	n	0.29	0.43	1.46	y	0.022336	-6.58552	down	ENSG00000259590.1	RP11-20G13.3	chr15	lincRNA		--
novel_IR_5360	chr16	11462303	11469175	-	IntronR	ENST00000598234.5	novel	1.1	0.23	0.21	y	1	0.12	0	n	0.04	0.02	0.55	n	0.1	0.28	2.7	n	0.00792301	-16.8069	down	ENSG00000188897.8	CTD-3088G3.8	chr16	protein_coding		--
novel_IR_5426	chr16	1655300	1655877	+	IntronR	ENST00000397412.7	novel	0.12	2.74	23.42	n	0.1	2.29	22.91	n	0.23	4.14	17.93	y	0.22	6.48	28.86	y	0.0239816	10.2859	up	ENSG00000007545.15	CRAMP1L	chr16	protein_coding	Crm, cramped-like (Drosophila)
novel_IR_5477	chr16	1998585	1998702	-	IntronR	ENST00000563630.5	novel	0.2	27.43	135.65	y	0.18	20.12	109.49	n	0.08	10.13	131.39	n	0.09	12.02	132.24	n	0.0273751	-9.39149	down	ENSG00000167962.12	ZNF598	chr16	protein_coding	zinc finger protein 598
novel_IR_5515	chr16	2210650	2210783	-	IntronR	ENST00000328540.7	novel	0.06	0.98	15.41	n	0.04	0.44	12.01	n	0.21	3.43	16.08	y	0.24	3.13	12.78	n	0.016102	9.70725	up	ENSG00000182685.7	BRICD5	chr16	protein_coding	BRICHOS domain containing 5
novel_IR_5526	chr16	2240145	2243046	-	IntronR	ENST00000301729.8	novel	0.15	7.05	46.59	n	0.16	7.78	48.74	n	0.24	10.13	43.03	y	0.22	10.67	48.71	y	0.0445338	6.7082	up	ENSG00000167969.12	ECI1	chr16	protein_coding	enoyl-CoA delta isomerase 1
novel_IR_5607	chr16	28600970	28601716	-	IntronR	ENST00000613051.1	novel	0.92	2.21	2.41	y	0.98	1.12	1.14	n	0.31	1.72	5.63	y	0.3	0.46	1.54	y	0.025615	-21.2075	down	ENSG00000278665.1	RP11-666O2.4	chr16	unprocessed_pseudogene		--
novel_IR_5689	chr16	30113064	30113340	-	IntronR	ENST00000406256.7	novel	0.69	0.82	1.18	y	0.57	3.58	6.25	y	0.2	0.95	4.8	n	0.07	0.53	7.35	n	0.0309188	-5.59581	down	ENSG00000102886.14	GDPD3	chr16	protein_coding	glycerophosphodiester phosphodiesterase domain containing 3
novel_IR_5752	chr16	31140415	31140492	-	IntronR	ENST00000268281.8	novel	0.77	2.58	3.35	y	0.62	2.72	4.4	y	0	0	2.35	n	0.13	0.92	7	n	0.0251343	-6.34779	down	ENSG00000178226.10	PRSS36	chr16	protein_coding	protease, serine, 36
novel_IR_5833	chr16	4795076	4795715	+	IntronR	ENST00000615471.4	novel	0.07	0.07	0.93	n	0.12	0.38	3.21	n	0.42	0.23	0.55	n	0.5	2.75	5.53	y	0.0261825	7.73798	up	ENSG00000267795.5	SMIM22	chr16	protein_coding	small integral membrane protein 22
novel_IR_6017	chr16	67881417	67881497	+	IntronR	ENST00000358933.9	novel	0.09	8.65	96.02	n	0.11	10.57	95.68	n	0.2	12.9	63.41	y	0.23	20.18	89.53	y	0.0329611	6.37905	up	ENSG00000038358.14	EDC4	chr16	protein_coding	enhancer of mRNA decapping 4
novel_IR_6053	chr16	69925484	69929448	+	IntronR	ENST00000568684.1	novel	0.34	1.47	4.27	y	0.35	2.11	6	y	0.29	1.62	5.56	y	0.28	1.34	4.82	y	0.0136061	-8.48528	down	ENSG00000198373.12	WWP2	chr16	protein_coding	WW domain containing E3 ubiquitin protein ligase 2
novel_IR_6183	chr16	84130171	84130337	-	IntronR	ENST00000434463.7	novel	1.53	93.8	61.19	y	1.51	93.7	61.98	y	1.31	73.83	56.38	y	1.3	78.02	59.85	y	0.00960498	-19.2302	down	ENSG00000103160.11	HSDL1	chr16	protein_coding	hydroxysteroid dehydrogenase like 1
novel_IR_6211	chr16	85079003	85081315	+	IntronR	ENST00000538274.5	novel	0.47	1.35	2.9	y	0.48	2.8	5.87	y	0.22	1.77	8.15	n	0.25	1.65	6.74	y	0.0244004	-15.1789	down	ENSG00000135709.12	KIAA0513	chr16	protein_coding	KIAA0513
novel_IR_6255	chr16	88737646	88737728	-	IntronR	ENST00000301015.13	novel	0.35	27.43	78.58	y	0.36	35.67	98.29	y	0.17	19.81	113.46	n	0.19	18.02	95.36	n	0.012987	-15.6525	down	ENSG00000103335.19	PIEZO1	chr16	protein_coding	piezo-type mechanosensitive ion channel component 1
novel_IR_6293	chr16	89733557	89733921	+	IntronR	ENST00000289816.9	novel	0.2	16.97	85.69	n	0.18	8.16	46.63	n	0.27	14.85	54.66	y	0.28	15.71	55.98	n	0.037184	7.60263	up	ENSG00000158805.11	ZNF276	chr16	protein_coding	zinc finger protein 276
novel_IR_6294	chr16	89733557	89733921	+	IntronR	ENST00000568064.5	novel	0.2	16.97	85.69	n	0.18	8.16	46.63	n	0.27	14.85	54.66	n	0.28	15.71	55.98	y	0.037184	7.60263	up	ENSG00000158805.11	ZNF276	chr16	protein_coding	zinc finger protein 276
novel_IR_6327	chr17	11983404	11984113	-	IntronR	ENST00000454073.7	novel	0.2	1.92	9.56	y	0.21	1.41	6.6	y	0.07	0.47	6.5	n	0.06	1	15.65	n	0.0025413	-19.799	down	ENSG00000154957.13	ZNF18	chr17	protein_coding	zinc finger protein 18
novel_IR_6416	chr17	19334463	19334624	-	IntronR	ENST00000581122.1	novel	0.86	48.2	56.09	y	0.83	51.01	61.76	y	1.02	63.23	61.96	y	0.99	60.29	60.73	y	0.0171278	7.54247	up	ENSG00000265263.1	RP11-135L13.4	chr17	antisense		--
novel_IR_6504	chr17	28704212	28711570	-	IntronR	ENST00000581289.1	novel	0.3	3.81	12.62	n	0.34	5.45	16.03	y	0.49	3.62	7.45	y	0.47	5.07	10.76	n	0.0405833	7.15542	up	ENSG00000167525.13	PROCA1	chr17	protein_coding	protein interacting with cyclin A1
novel_IR_6516	chr17	28745599	28747163	-	IntronR	ENST00000577325.1	novel	0.9	21.71	24.04	y	0.93	21.02	22.57	y	1.16	32.29	27.79	y	1.21	42.56	35.05	y	0.0208599	9.26092	up	ENSG00000265474.1	AC010761.9	chr17	antisense		--
novel_IR_6534	chr17	29607877	29607986	+	IntronR	ENST00000614878.4	novel	0.37	7.67	20.6	y	0.39	8.43	21.66	y	0.18	4.07	23.28	n	0.14	5.78	41.81	n	0.0255845	-9.8387	down	ENSG00000198720.12	ANKRD13B	chr17	protein_coding	ankyrin repeat domain 13B
novel_IR_6553	chr17	31874318	31886572	+	IntronR	ENST00000583236.1	novel	3.76	11.4	3.03	n	4.1	11.55	2.82	y	2.56	12.28	4.81	y	2.32	11.38	4.9	y	0.0250222	-7.16048	down	ENSG00000263990.1	CTC-542B22.2	chr17	lincRNA		--
novel_IR_6565	chr17	35188636	35190900	+	IntronR	ENST00000590144.1	novel	0.27	1.02	3.76	y	0.22	0.78	3.48	y	0.05	0.12	2.7	n	0.03	0.13	4.05	n	0.0480761	-7.61351	down	ENSG00000266981.1	RP11-799D4.2	chr17	processed_transcript		--
novel_IR_6654	chr17	41501744	41502374	-	IntronR	ENST00000246635.7	novel	2.22	0.23	0.11	n	2.78	0.9	0.32	y	0.08	0.34	4.11	n	0.76	0.7	0.92	n	0.0450528	-4.7224	down	ENSG00000171401.14	KRT13	chr17	protein_coding	keratin 13, type I
novel_IR_6721	chr17	43879984	43880691	-	IntronR	ENST00000377184.7	novel	0.01	0.21	22.99	n	0.06	1.26	20.61	n	0.17	2.36	14.06	n	0.22	2.62	11.87	y	0.04552	4.52548	up	ENSG00000108852.14	MPP2	chr17	protein_coding	membrane protein, palmitoylated 2 (MAGUK p55 subfamily member 2)
novel_IR_6733	chr17	44310032	44311385	-	IntronR	ENST00000588097.5	novel	0.3	1.15	3.88	y	0.27	1.02	3.8	n	0.11	0.33	3.02	n	0.15	0.85	5.5	n	0.0299646	-6.2	down	ENSG00000267750.5	RUNDC3A-AS1	chr17	antisense	RUNDC3A antisense RNA 1
novel_IR_6855	chr17	48549946	48550340	+	IntronR	ENST00000435312.5	novel	1.71	9.33	5.45	y	1.09	8.7	7.98	y	4.85	10.5	2.17	y	5.22	13.51	2.59	y	0.0183948	10.0691	up	ENSG00000230148.8	HOXB-AS1	chr17	antisense	HOXB cluster antisense RNA 1
novel_IR_6859	chr17	48552090	48555531	-	IntronR	ENST00000460160.5	novel	0.86	3.41	3.95	y	0.8	3.1	3.88	y	1.52	2.48	1.64	y	1.54	3.77	2.45	y	0.0154199	22.1359	up	ENSG00000120093.11	HOXB3	chr17	protein_coding	homeobox B3
novel_IR_6948	chr17	50944200	50948049	+	IntronR	ENST00000512717.1	novel	0.07	0.04	0.56	n	0.14	0.08	0.56	n	1.07	0.12	0.11	y	1	0.04	0	n	0.00282072	18.7888	up	ENSG00000251665.1	RP11-700H6.2	chr17	lincRNA		--
novel_IR_7025	chr17	63433415	63435086	-	IntronR	ENST00000582297.5	novel	1.02	23.66	23.16	y	1.03	27.96	27.18	y	0.8	27.94	34.84	y	0.83	28.4	34.23	y	0.0286962	-13.2816	down	ENSG00000008283.15	CYB561	chr17	protein_coding	cytochrome b561
novel_IR_7066	chr17	65536553	65537324	-	IntronR	ENST00000618960.4	novel	0	0	2.28	n	0.05	0.21	4.51	n	0.43	2.04	4.75	y	0.45	0.92	2.06	n	0.0192056	15.4127	up	ENSG00000168646.12	AXIN2	chr17	protein_coding	axin 2
novel_IR_7305	chr17	77088949	77089153	+	IntronR	ENST00000392476.6	novel	0.26	8.19	31.11	n	0.24	7.23	29.93	y	0.12	5.45	45.39	n	0.13	4.86	37.72	n	0.0212375	-11.1803	down	ENSG00000129657.14	SEC14L1	chr17	protein_coding	SEC14-like 1 (S. cerevisiae)
novel_IR_7329	chr17	78344261	78347357	+	IntronR	ENST00000586321.1	novel	1.37	3.08	2.25	y	1.71	3.56	2.08	y	3.66	3.78	1.03	y	3.39	2.32	0.68	y	0.0137282	9.14397	up	ENSG00000267737.1	AC061992.2	chr17	lincRNA		--
novel_IR_7353	chr17	78676169	78680190	-	IntronR	ENST00000585509.5	novel	0.3	46.34	156.58	y	0.31	50.13	162.61	y	0.35	54.28	155.99	y	0.36	57.11	160.27	y	0.0194193	7.07107	up	ENSG00000108669.16	CYTH1	chr17	protein_coding	cytohesin 1
novel_IR_7409	chr17	8076743	8076990	-	IntronR	ENST00000319144.4	novel	0	0	1.93	n	0.16	0.68	4.31	n	1.12	2.46	2.19	y	1	1.09	1.09	n	0.0130684	9.8	up	ENSG00000179477.9	ALOX12B	chr17	protein_coding	arachidonate 12-lipoxygenase, 12R type
novel_IR_7490	chr17	82113765	82127692	-	IntronR	ENST00000392346.6	novel	0.17	2.2	13.2	n	0.18	2.28	12.91	n	0.25	2.89	11.55	y	0.26	4.05	15.74	y	0.00772212	11.3137	up	ENSG00000176155.18	CCDC57	chr17	protein_coding	coiled-coil domain containing 57
novel_IR_7570	chr18	21673663	21682151	+	IntronR	ENST00000578583.1	novel	1.48	2.17	1.47	n	1.44	3.08	2.14	y	0.88	2.93	3.34	y	0.8	4.37	5.44	y	0.0155112	-13.8636	down	ENSG00000265656.1	RP11-13N13.6	chr18	antisense		--
novel_IR_7636	chr18	46228896	46231779	+	IntronR	ENST00000615553.1	novel	1.14	0.51	0.45	y	1.18	0.66	0.56	n	0.7	0.3	0.44	n	0.76	0.73	0.96	n	0.0112934	-11.9261	down	ENSG00000152242.10	C18orf25	chr18	protein_coding	chromosome 18 open reading frame 25
novel_IR_7758	chr19	1005553	1007628	+	IntronR	ENST00000234389.3	novel	3.07	2.19	0.72	n	4.19	3.08	0.74	n	7.91	1.39	0.18	y	9.08	3.39	0.37	n	0.0267282	6.00743	up	ENSG00000116032.5	GRIN3B	chr19	protein_coding	glutamate receptor, ionotropic, N-methyl-D-aspartate 3B
novel_IR_7815	chr19	11252248	11252482	-	IntronR	ENST00000294618.11	novel	0.22	4	18.13	y	0.27	6.52	24.13	y	0.5	12.03	23.98	y	0.56	11.09	19.89	y	0.0199128	7.2981	up	ENSG00000130158.13	DOCK6	chr19	protein_coding	dedicator of cytokinesis 6
novel_IR_7825	chr19	11374929	11375513	+	IntronR	ENST00000312423.2	novel	0.4	0.75	1.87	n	0.08	0.18	2.22	n	1.48	2.27	1.53	y	1.19	2.24	1.88	y	0.0374865	5.07113	up	ENSG00000173928.2	SWSAP1	chr19	protein_coding	SWIM-type zinc finger 7 associated protein 1
novel_IR_8035	chr19	17754685	17755122	+	IntronR	ENST00000594202.5	novel	0.32	2.57	8.02	y	0.27	1.64	6.02	y	0.05	0.67	13.06	n	0.02	0.09	4.16	n	0.0221702	-8.91793	down	ENSG00000130475.14	FCHO1	chr19	protein_coding	FCH domain only 1
novel_IR_8071	chr19	18218498	18218940	-	IntronR	ENST00000355502.7	novel	0.07	0.63	9.32	n	0.1	0.83	8.25	n	0.29	2.76	9.46	y	0.26	2.6	9.98	y	0.012237	8.95669	up	ENSG00000105650.21	PDE4C	chr19	protein_coding	phosphodiesterase 4C, cAMP-specific
novel_IR_8119	chr19	19335735	19336122	+	IntronR	ENST00000262815.12	novel	0.12	4.29	34.8	n	0.18	2.61	14.2	n	0.35	4.48	12.94	y	0.31	6.86	21.87	y	0.049697	4.9923	up	ENSG00000129933.20	MAU2	chr19	protein_coding	MAU2 sister chromatid cohesion factor
novel_IR_8331	chr19	3746695	3746776	+	IntronR	ENST00000541714.6	novel	0.15	2.04	13.57	n	0.12	0.75	6.1	n	0.51	3.39	6.65	y	0.52	0.72	1.39	n	0.0139506	24.0333	up	ENSG00000105289.14	TJP3	chr19	protein_coding	tight junction protein 3
novel_IR_8432	chr19	40442086	40444215	-	IntronR	ENST00000322354.3	novel	0.14	3.56	25.97	n	0.11	2.89	26.44	n	0.27	6.87	25.32	y	0.32	9.59	30.21	y	0.0437537	5.83095	up	ENSG00000167565.12	SERTAD3	chr19	protein_coding	SERTA domain containing 3
novel_IR_8545	chr19	43774349	43774561	-	IntronR	ENST00000615047.4	novel	1.19	76.51	64.28	y	1.14	58.99	51.53	y	1.01	65.32	64.39	y	0.95	65.35	68.67	y	0.0444442	-4.73736	down	ENSG00000104783.11	KCNN4	chr19	protein_coding	potassium channel, calcium activated intermediate/small conductance subfamily N alpha, member 4
novel_IR_8558	chr19	44108337	44112822	-	IntronR	ENST00000592946.1	novel	0.32	7.44	23.39	y	0.33	8.11	24.63	y	0.28	8.08	28.91	y	0.27	8.36	31.08	y	0.0194193	-7.07107	down	ENSG00000186019.10	AC084219.4	chr19	antisense		--
novel_IR_8563	chr19	44329936	44336623	-	IntronR	ENST00000588212.1	novel	0.12	0.5	4.31	n	0.14	0.53	3.83	n	0.21	1.26	6	y	0.24	0.88	3.75	y	0.0454248	5.26965	up	ENSG00000267173.1	CTC-512J12.6	chr19	protein_coding		--
novel_IR_8634	chr19	46019419	46019526	-	IntronR	ENST00000008938.4	novel	2.53	3.45	1.37	y	2.05	5.03	2.46	y	4.65	5.42	1.17	y	4.89	1.58	0.32	n	0.0280191	9.24241	up	ENSG00000008438.4	PGLYRP1	chr19	protein_coding	peptidoglycan recognition protein 1
novel_IR_8639	chr19	46195158	46196109	+	IntronR	ENST00000597989.1	novel	3.12	36.56	11.73	y	2.75	27.71	10.07	y	4.45	32.98	7.41	y	4.23	39.95	9.44	y	0.0370238	6.52783	up	ENSG00000267922.1	AC007193.6	chr19	lincRNA		--
novel_IR_8677	chr19	48210416	48212966	+	IntronR	ENST00000595201.1	novel	1.18	3.31	2.81	y	1.15	4.23	3.68	y	0.78	3	3.84	n	0.79	3.58	4.5	n	0.0139506	-24.0333	down	ENSG00000268583.1	CTC-453G23.8	chr19	antisense		--
novel_IR_8732	chr19	49309826	49310040	-	IntronR	ENST00000335875.8	novel	0.07	0.23	3.3	n	0.08	0.23	3	n	0.3	1.35	4.51	y	0.34	2.15	6.23	y	0.0403995	11.8842	up	ENSG00000063127.15	SLC6A16	chr19	protein_coding	solute carrier family 6, member 16
novel_IR_8734	chr19	49310510	49310933	-	IntronR	ENST00000335875.8	novel	1.51	7.77	5.14	y	1.35	5.75	4.28	y	0.99	5.28	5.34	y	0.83	6.14	7.43	y	0.044221	-4.59619	down	ENSG00000063127.15	SLC6A16	chr19	protein_coding	solute carrier family 6, member 16
novel_IR_8848	chr19	52800239	52800492	-	IntronR	ENST00000360272.5	novel	1.14	17.07	14.95	y	1.25	24.88	19.9	y	0.67	13.97	20.73	y	0.79	13.84	17.61	y	0.0298029	-5.71294	down	ENSG00000189190.8	ZNF600	chr19	protein_coding	zinc finger protein 600
novel_IR_8899	chr19	55165463	55165782	-	IntronR	ENST00000455045.5	novel	1.2	5.87	4.88	y	1.41	5.47	3.89	y	0.65	3.11	4.75	n	0.54	3.45	6.43	n	0.0496264	-5.98991	down	ENSG00000167646.13	DNAAF3	chr19	protein_coding	dynein, axonemal, assembly factor 3
novel_IR_8943	chr19	56302983	56304774	+	IntronR	ENST00000587247.1	novel	0.14	0.62	4.34	n	0.3	0.08	0.27	n	0.84	0.92	1.1	y	1	0.25	0	n	0.0251415	6.18718	up	ENSG00000267710.5	AC006116.20	chr19	processed_transcript		--
novel_IR_9059	chr19	7647247	7647354	+	IntronR	ENST00000622853.4	novel	0.2	15.22	74.44	y	0.22	22.24	102.45	y	0.07	5.23	80.33	n	0.04	3.75	89.27	n	0.0198301	-8.59785	down	ENSG00000076944.14	STXBP2	chr19	protein_coding	syntaxin binding protein 2
novel_IR_9092	chr19	860773	860861	+	IntronR	ENST00000327726.10	novel	0.03	1.55	61.22	n	0.07	3.4	49.07	n	0.21	10.63	50.72	y	0.25	12	48.23	y	0.0238129	6.36396	up	ENSG00000197766.7	CFD	chr19	protein_coding	complement factor D (adipsin)
novel_IR_9225	chr2	127629826	127630778	+	IntronR	ENST00000428314.5	novel	0.23	2.09	9	y	0.27	1.13	4.24	y	0.08	0.54	6.69	n	0.12	1.19	9.96	n	0.0337651	-5.3033	down	ENSG00000169994.18	MYO7B	chr2	protein_coding	myosin VIIB
novel_IR_9262	chr2	131501070	131501181	+	IntronR	ENST00000415574.6	novel	0.25	2.45	9.88	n	0.21	3.01	14.49	y	0.73	9.55	13.05	y	0.7	7.77	11.16	y	0.00371909	19.4	up	ENSG00000152117.17	AC093838.4	chr2	transcribed_processed_pseudogene		--
novel_IR_9291	chr2	147918592	147920230	+	IntronR	ENST00000241416.11	novel	0.07	0.51	6.85	n	0.1	0.45	4.36	n	0.2	1.09	5.36	y	0.23	0.91	4.03	y	0.0256088	6.12826	up	ENSG00000121989.14	ACVR2A	chr2	protein_coding	activin A receptor, type IIA
novel_IR_9482	chr2	178602150	178602282	-	IntronR	ENST00000342992.10	novel	0.45	2.04	4.55	y	0.47	0.62	1.33	n	1.11	2.96	2.68	y	1.17	4.1	3.51	y	0.0159737	21.5035	up	ENSG00000155657.23	TTN	chr2	protein_coding	titin
novel_IR_9706	chr2	218634630	218635796	+	IntronR	ENST00000450993.6	novel	0.33	4.3	13.19	y	0.31	3.84	12.6	y	0.51	4.67	9.12	y	0.55	7.03	12.72	y	0.0273751	9.39149	up	ENSG00000115556.13	PLCD4	chr2	protein_coding	phospholipase C, delta 4
novel_IR_9741	chr2	219299384	219299985	-	IntronR	ENST00000409251.7	novel	1.57	6.5	4.13	y	1.36	7.66	5.65	y	0.7	4.14	5.92	y	0.83	1.73	2.09	y	0.0440269	-5.66843	down	ENSG00000054356.13	PTPRN	chr2	protein_coding	protein tyrosine phosphatase, receptor type, N
novel_IR_9742	chr2	219299786	219299985	-	IntronR	ENST00000295718.6	novel	1.81	12.36	6.81	y	1.56	12.49	8.02	y	0.58	4.92	8.54	y	0.89	2.43	2.73	y	0.0448917	-4.77092	down	ENSG00000054356.13	PTPRN	chr2	protein_coding	protein tyrosine phosphatase, receptor type, N
novel_IR_9808	chr2	230814046	230814052	+	IntronR	ENST00000614925.1	novel	0.42	53.4	127.17	n	0.43	49.8	115.88	y	0.34	37.6	110.23	y	0.33	30	90.09	n	0.00611627	-12.7279	down	ENSG00000135932.10	CAB39	chr2	protein_coding	calcium binding protein 39
novel_IR_10010	chr2	38296700	38298144	-	IntronR	ENST00000406122.5	novel	0.12	15.16	121.64	n	0.14	18.24	132.87	n	0.22	26.95	124.59	y	0.2	24.08	122.91	n	0.0298575	5.65685	up	ENSG00000119787.13	ATL2	chr2	protein_coding	atlastin GTPase 2
novel_IR_10106	chr2	66548019	66567453	+	IntronR	ENST00000560281.6	novel	0.16	0.31	1.96	n	0.15	0.4	2.56	n	0.2	0.6	3.01	n	0.21	0.82	3.92	y	0.0194193	7.07107	up	ENSG00000143995.19	MEIS1	chr2	protein_coding	Meis homeobox 1
novel_IR_10125	chr2	70053994	70055656	-	IntronR	ENST00000439670.6	novel	0.65	2.65	4.1	n	0.64	1.87	2.94	n	0.39	2.56	6.65	y	0.37	2.06	5.63	y	0.00706748	-23.7023	down	ENSG00000179818.13	PCBP1-AS1	chr2	processed_transcript	PCBP1 antisense RNA 1
novel_IR_10222	chr2	8682906	8683685	+	IntronR	ENST00000234091.8	novel	0.18	1.12	6.18	n	0.03	0.19	5.61	n	0.88	4.4	4.98	y	0.8	5.33	6.64	y	0.0280608	8.64706	up	ENSG00000115738.9	ID2	chr2	protein_coding	inhibitor of DNA binding 2, dominant negative helix-loop-helix protein
novel_IR_10280	chr2	97164311	97167577	+	IntronR	ENST00000620383.1	novel	0.4	3.48	8.76	y	0.5	3.79	7.53	y	0.81	4.09	5.03	y	0.74	5.11	6.88	y	0.0422488	5.32501	up	ENSG00000135976.16	ANKRD36	chr2	protein_coding	ankyrin repeat domain 36
novel_IR_10556	chr20	41459449	41461718	-	IntronR	ENST00000423903.1	novel	0.38	0.45	1.19	y	1.22	0.58	0.48	n	6.35	1.28	0.2	y	6.55	1.01	0.15	y	0.0372446	13.0866	up	ENSG00000235088.1	RP4-620E11.4	chr20	processed_pseudogene		--
novel_IR_10665	chr20	58236274	58238211	-	IntronR	ENST00000334187.12	novel	0.34	5.41	16.1	y	0.32	6.54	20.61	y	0.45	5.41	12.13	y	0.47	6.21	13.3	y	0.0116283	9.19239	up	ENSG00000124224.16	PPP4R1L	chr20	transcribed_unprocessed_pseudogene	protein phosphatase 4, regulatory subunit 1-like (pseudogene)
novel_IR_10707	chr20	62882414	62890960	-	IntronR	ENST00000395343.5	novel	0.12	6.86	58.76	n	0.13	7.47	57.98	n	0.2	11.46	58.73	n	0.22	13.34	61.54	y	0.037184	7.60263	up	ENSG00000101191.16	DIDO1	chr20	protein_coding	death inducer-obliterator 1
novel_IR_10719	chr20	63242623	63244024	-	IntronR	ENST00000370307.6	novel	0.98	6.75	6.86	y	0.93	7	7.49	y	0.39	5.07	12.84	y	0.34	6.4	18.86	y	0.0035717	-16.6877	down	ENSG00000101198.14	NKAIN4	chr20	protein_coding	Na+/K+ transporting ATPase interacting 4
novel_IR_10741	chr20	63697191	63697328	+	IntronR	ENST00000369996.1	novel	1.02	6.51	6.42	y	1.19	6.1	5.12	n	0.2	0.61	3.1	n	0.29	1.84	6.29	n	0.0269855	-8.94185	down	ENSG00000243509.4	TNFRSF6B	chr20	protein_coding	tumor necrosis factor receptor superfamily, member 6b, decoy
novel_IR_10771	chr21	25585754	25588835	-	IntronR	ENST00000352957.8	novel	0.07	2.28	32.36	n	0.1	2.46	24.63	n	0.23	3.84	16.69	y	0.24	5.32	22.39	y	0.0431348	9.48683	up	ENSG00000154719.13	MRPL39	chr21	protein_coding	mitochondrial ribosomal protein L39
novel_IR_10808	chr21	33557316	33557546	+	IntronR	ENST00000381679.8	novel	0.08	5.53	66.19	n	0.1	7.28	71.62	n	0.23	18.45	78.5	y	0.2	18.05	90.67	n	0.0286201	6.93375	up	ENSG00000159140.17	SON	chr21	protein_coding	SON DNA binding protein
novel_IR_10843	chr21	39216783	39217401	+	IntronR	ENST00000419324.1	novel	0.11	0.47	4.41	n	0.01	0.02	1.99	n	0.83	0.52	0.62	n	0.75	0.61	0.81	y	0.00898108	11.4007	up	ENSG00000232608.1	TIMM9P2	chr21	processed_pseudogene	TIMM9 pseudogene 2
novel_IR_10868	chr21	42734682	42741094	-	IntronR	ENST00000437426.1	novel	0	0	0.25	n	0.23	0.02	0.1	n	1	0.09	0	n	1.15	0.22	0.19	y	0.0291023	6.99223	up	ENSG00000225731.1	AP001627.1	chr21	antisense		--
novel_IR_10882	chr21	43797551	43797631	+	IntronR	ENST00000497547.1	novel	0	0	73.14	n	0.01	1.23	87.28	n	0.23	27.35	118.26	y	0.21	24.9	116.66	y	0.00960498	19.2302	up	ENSG00000160214.12	RRP1	chr21	protein_coding	ribosomal RNA processing 1
novel_IR_10961	chr21	9807820	9808174	-	IntronR	ENST00000623933.1	novel	0	0	0.12	n	0.17	0.54	3.15	n	0.73	1.94	2.66	y	0.56	0.71	1.27	y	0.0431194	4.65859	up	ENSG00000280081.3	MGC39584	chr21	lincRNA		--
novel_IR_10996	chr22	19852486	19854443	-	IntronR	ENST00000405640.1	novel	0.13	2.88	21.46	n	0.11	2.04	19.13	n	0.21	4.38	20.98	y	0.2	4.52	22.14	y	0.037184	7.60263	up	ENSG00000215012.8	C22orf29	chr22	protein_coding	chromosome 22 open reading frame 29
novel_IR_11036	chr22	20957486	20964391	+	IntronR	ENST00000444039.1	novel	0.2	0.52	2.58	y	0.18	0.16	0.9	n	0.11	0.49	4.3	n	0.08	0.15	1.92	n	0.0454248	-5.26965	down	ENSG00000237476.1	XXbac-B135H6.15	chr22	lincRNA		--
novel_IR_11068	chr22	22294081	22294620	+	IntronR	ENST00000412149.1	novel	1.41	1.27	0.9	y	1.05	1.91	1.82	n	0	0	2.92	n	0.23	0.55	2.4	n	0.048447	-5.22004	down	ENSG00000234630.1	LL22NC03-2H8.4	chr22	lincRNA		--
novel_IR_11178	chr22	31275308	31278297	+	IntronR	ENST00000331728.8	novel	0.07	0.96	13.98	n	0.1	1.53	14.61	n	0.19	2.13	11.16	n	0.22	2.42	10.79	y	0.0298575	5.65685	up	ENSG00000182541.17	LIMK2	chr22	protein_coding	LIM domain kinase 2
novel_IR_11200	chr22	32376721	32377326	+	IntronR	ENST00000420171.1	novel	1.65	0.41	0.25	y	1	0.49	0	n	5.26	0.81	0.15	y	4.67	0.42	0.09	n	0.014627	8.2931	up	ENSG00000230736.2	RP1-149A16.3	chr22	lincRNA		--
novel_IR_11217	chr22	37061629	37062525	+	IntronR	ENST00000402077.7	novel	0.52	9.24	17.68	y	0.56	8.78	15.62	y	0.31	4.92	15.68	y	0.34	5.42	15.87	y	0.0165861	-8.6	down	ENSG00000100379.17	KCTD17	chr22	protein_coding	potassium channel tetramerization domain containing 17
novel_IR_11399	chr22	50527283	50527588	-	IntronR	ENST00000395680.5	novel	0.07	2.68	40.26	n	0.09	4.09	43.09	n	0.22	7.37	33.49	y	0.2	4.95	24.26	n	0.0116283	9.19239	up	ENSG00000025708.12	TYMP	chr22	protein_coding	thymidine phosphorylase
novel_IR_11543	chr3	12585253	12585681	-	IntronR	ENST00000251849.8	novel	0.14	19.93	144	n	0.12	19.38	161.86	n	0.23	31.67	139.96	y	0.24	41.19	172.53	y	0.0273751	9.39149	up	ENSG00000132155.11	RAF1	chr3	protein_coding	Raf-1 proto-oncogene, serine/threonine kinase
novel_IR_11573	chr3	128076079	128078739	+	IntronR	ENST00000485218.1	novel	1.4	0.49	0.35	y	1.54	1.47	0.95	y	0.31	0.55	1.75	y	0.57	1.01	1.78	y	0.0382243	-6.97604	down	ENSG00000239608.1	RUVBL1-AS1	chr3	antisense	RUVBL1 antisense RNA 1
novel_IR_11586	chr3	129315638	129315806	+	IntronR	ENST00000511998.1	novel	1.07	836.31	779.27	y	1.08	771.22	715.49	y	1.12	754.83	673.88	y	1.13	778.28	686.12	y	0.0194193	7.07107	up	ENSG00000206417.8	H1FX-AS1	chr3	antisense	H1FX antisense RNA 1
novel_IR_11675	chr3	149207617	149209211	-	IntronR	ENST00000264613.10	novel	0.4	1	2.47	y	0.33	0.53	1.59	y	0.04	0.08	1.79	n	0.02	0.09	3.78	n	0.0499492	-9.20316	down	ENSG00000047457.13	CP	chr3	protein_coding	ceruloplasmin (ferroxidase)
novel_IR_11741	chr3	169795611	169796214	-	IntronR	ENST00000446859.5	novel	0.39	1.11	2.82	y	0.29	1.59	5.47	y	0.09	0.25	2.78	n	0.01	0.05	5.09	n	0.0495775	-4.52904	down	ENSG00000171757.15	LRRC34	chr3	protein_coding	leucine rich repeat containing 34
novel_IR_11855	chr3	197661777	197665500	-	IntronR	ENST00000424493.1	novel	1.19	0.49	0.41	y	1.38	0.28	0.2	n	0.15	0.12	0.8	n	0.37	0.08	0.21	y	0.0206348	-7.05221	down	ENSG00000236833.1	AC024560.2	chr3	lincRNA		--
novel_IR_11959	chr3	46680541	46681246	-	IntronR	ENST00000318962.8	novel	0.21	4.82	23.19	n	0.17	3.62	20.71	n	0.38	6.12	15.97	y	0.43	5.37	12.41	n	0.0241881	6.71547	up	ENSG00000178038.16	ALS2CL	chr3	protein_coding	ALS2 C-terminal like
novel_IR_11964	chr3	46902790	46903270	+	IntronR	ENST00000449590.5	novel	2.37	0.61	0.26	n	2.23	0.8	0.36	y	0.15	0.25	1.67	n	0.07	0.03	0.49	n	0.00412734	-27.1636	down	ENSG00000160801.13	PTH1R	chr3	protein_coding	parathyroid hormone 1 receptor
novel_IR_11972	chr3	47235617	47236034	-	IntronR	ENST00000335044.6	novel	3.1	1.77	0.57	n	3.8	3.75	0.99	y	0.36	0.24	0.67	n	0.14	0.32	2.35	n	0.0499043	-8.72223	down	ENSG00000088727.12	KIF9	chr3	protein_coding	kinesin family member 9
novel_IR_11975	chr3	47241015	47244791	-	IntronR	ENST00000444589.6	novel	0.77	2.22	2.88	y	0.92	2.41	2.62	y	0.31	1.34	4.38	y	0.24	0.89	3.69	n	0.0465843	-6.88699	down	ENSG00000088727.12	KIF9	chr3	protein_coding	kinesin family member 9
novel_IR_12089	chr3	49909400	49910119	-	IntronR	ENST00000296473.7	novel	0.41	4.24	10.36	n	0.45	5.11	11.49	y	0.18	2.08	11.4	n	0.17	3.11	17.9	n	0.0386313	-12.3693	down	ENSG00000164077.13	MON1A	chr3	protein_coding	MON1 secretory trafficking family member A
novel_IR_12159	chr3	52373053	52375240	+	IntronR	ENST00000420323.6	novel	0.08	0.14	1.83	n	0.2	0.6	2.96	n	0.58	0.57	0.99	y	0.5	0.65	1.29	n	0.0416957	5.547	up	ENSG00000114841.17	DNAH1	chr3	protein_coding	dynein, axonemal, heavy chain 1
novel_IR_12470	chr4	154585710	154586786	-	IntronR	ENST00000622532.1	novel	0.67	1.19	1.78	y	0.91	2.08	2.28	y	1.87	2.85	1.53	y	2.1	3.08	1.46	y	0.018893	7.1898	up	ENSG00000171560.14	FGA	chr4	protein_coding	fibrinogen alpha chain
novel_IR_12480	chr4	163129348	163133154	-	IntronR	ENST00000274054.2	novel	0.07	0.99	13.51	n	0.06	0.81	13.27	n	0.21	2.92	13.95	n	0.22	4.87	22.1	y	0.00221484	21.2132	up	ENSG00000145414.8	NAF1	chr4	protein_coding	nuclear assembly factor 1 ribonucleoprotein
novel_IR_12596	chr4	39217240	39217987	+	IntronR	ENST00000506503.1	novel	0.02	0.11	5.36	n	0.11	0.54	4.8	n	0.38	2.09	5.48	y	0.32	1.97	6.13	y	0.0454248	5.26965	up	ENSG00000157796.17	WDR19	chr4	protein_coding	WD repeat domain 19
novel_IR_12662	chr4	6620044	6621188	+	IntronR	ENST00000285599.7	novel	0.3	4.16	14.06	y	0.29	4.98	17.11	y	0.42	6.06	14.41	y	0.45	7.22	15.89	y	0.0468821	8.85438	up	ENSG00000013288.8	MAN2B2	chr4	protein_coding	mannosidase, alpha, class 2B, member 2
novel_IR_12718	chr4	82900223	82900334	-	IntronR	ENST00000355196.6	novel	0.02	2.89	124.38	n	0.07	9.51	140.73	n	0.17	23.53	135.72	n	0.21	27.96	134.14	y	0.0495775	4.52904	up	ENSG00000138674.16	SEC31A	chr4	protein_coding	SEC31 homolog A (S. cerevisiae)
novel_IR_12838	chr5	132864380	132865437	-	IntronR	ENST00000296875.3	novel	1.53	1.43	0.94	y	1.83	0.96	0.53	n	0.44	0.14	0.31	n	0	0	0.53	n	0.0414105	-5.48315	down	ENSG00000164404.8	GDF9	chr5	protein_coding	growth differentiation factor 9
novel_IR_12853	chr5	134437033	134492129	+	IntronR	ENST00000513329.1	novel	0.32	0.15	0.48	y	0.2	0.13	0.67	n	0.63	0.13	0.21	n	0.78	0.18	0.23	y	0.0476023	4.63315	up	ENSG00000250994.1	AC005355.1	chr5	lincRNA		--
novel_IR_12920	chr5	141645821	141646603	-	IntronR	ENST00000522783.5	novel	0.55	18.21	33.05	y	0.59	14.21	23.93	y	0.77	13.81	17.87	y	0.8	14.36	18.04	y	0.0165861	8.6	up	ENSG00000197948.10	FCHSD1	chr5	protein_coding	FCH and double SH3 domains 1
novel_IR_12954	chr5	148430440	148430576	-	IntronR	ENST00000520980.2	novel	1.24	2.53	2.05	y	1.43	2.16	1.51	y	0.38	0.71	1.89	n	0.14	0.37	2.66	n	0.0225041	-7.02374	down	ENSG00000251330.3	CTD-2283N19.1	chr5	antisense		--
novel_IR_13002	chr5	159354121	159362208	+	IntronR	ENST00000515337.1	novel	1	0.14	0	n	0.92	0.34	0.37	y	0.46	0.09	0.2	n	0.33	0.14	0.43	n	0.0288122	-7.40288	down	ENSG00000249738.6	AC008697.1	chr5	lincRNA		--
novel_IR_13092	chr5	179023904	179024970	+	IntronR	ENST00000444149.6	novel	0.21	0.14	0.67	n	0	0	6.03	n	1	0.41	0	n	1.11	0.34	0.31	y	0.0322806	8.01467	up	ENSG00000234284.6	ZNF879	chr5	protein_coding	zinc finger protein 879
novel_IR_13155	chr5	36195282	36197541	-	IntronR	ENST00000397338.5	novel	0.13	7.25	55.57	n	0.11	6.77	59.17	n	0.18	8.96	49.23	n	0.2	9.71	48.42	y	0.0384761	4.94975	up	ENSG00000152620.12	NADK2	chr5	protein_coding	NAD kinase 2, mitochondrial
novel_IR_13196	chr5	50835015	50841966	+	IntronR	ENST00000281631.9	novel	0.07	0.9	12.5	n	0.08	1.06	13.5	n	0.34	4.1	12.17	y	0.37	5.04	13.68	y	0.0202306	17.7088	up	ENSG00000151883.16	PARP8	chr5	protein_coding	poly (ADP-ribose) polymerase family, member 8
novel_IR_13263	chr5	75598981	75599127	-	IntronR	ENST00000511329.1	novel	1.5	25.83	17.21	y	1.52	28.29	18.57	y	2.43	28.93	11.9	y	2.4	34.51	14.37	y	0.000929972	50.2004	up	ENSG00000248881.1	CTC-366B18.2	chr5	antisense		--
novel_IR_13271	chr5	79761957	79763062	+	IntronR	ENST00000446378.2	novel	0.16	0.4	2.55	n	0.26	0.56	2.13	y	0.56	0.52	0.94	n	0.64	1.32	2.07	y	0.0289609	6.09078	up	ENSG00000164309.14	CMYA5	chr5	protein_coding	cardiomyopathy associated 5
novel_IR_13377	chr6	111300156	111307361	-	IntronR	ENST00000368802.7	novel	0.09	1.51	17.11	n	0.12	2.02	16.39	n	0.19	3.43	18.18	n	0.22	5.44	24.22	y	0.0421737	4.71405	up	ENSG00000009413.15	REV3L	chr6	protein_coding	REV3-like, polymerase (DNA directed), zeta, catalytic subunit
novel_IR_13385	chr6	112076112	112076322	-	IntronR	ENST00000368662.9	novel	0.38	16.89	44.09	y	0.4	19.41	49.04	y	0.29	15.97	55.62	y	0.31	15.11	49.12	y	0.0238129	-6.36396	down	ENSG00000074935.13	TUBE1	chr6	protein_coding	tubulin, epsilon 1
novel_IR_13414	chr6	125081507	125082864	+	IntronR	ENST00000521654.6	novel	0.14	2.2	15.89	n	0.16	2.78	16.95	n	0.28	5.33	19.35	y	0.26	5.05	19.07	y	0.0136061	8.48528	up	ENSG00000146373.16	RNF217	chr6	protein_coding	ring finger protein 217
novel_IR_13464	chr6	134170435	134170826	-	IntronR	ENST00000367858.9	novel	0.26	55.54	210.09	y	0.28	54.73	196.39	y	0.37	83.36	226.31	y	0.35	87.47	250.23	y	0.0238129	6.36396	up	ENSG00000118515.11	SGK1	chr6	protein_coding	serum/glucocorticoid regulated kinase 1
novel_IR_13694	chr6	31505871	31506272	+	IntronR	ENST00000399150.7	novel	0.4	46.82	117.09	y	0.39	47.38	121.86	y	0.31	37.44	121.17	y	0.29	47.61	162.66	y	0.0316556	-8.49706	down	ENSG00000204516.9	MICB	chr6	protein_coding	MHC class I polypeptide-related sequence B
novel_IR_13703	chr6	31761865	31762112	+	IntronR	ENST00000375740.7	novel	0.3	17.26	58.42	y	0.28	14.21	51.16	y	0.4	23.94	60.46	y	0.38	26.61	69.99	y	0.0194193	7.07107	up	ENSG00000204410.14	MSH5	chr6	protein_coding	mutS homolog 5
novel_IR_13862	chr6	43213567	43213797	+	IntronR	ENST00000372647.6	novel	0.31	6.17	19.87	y	0.35	5.39	15.22	y	0.15	1.73	11.42	n	0.12	1.62	13.55	n	0.0198068	-7.8	down	ENSG00000112659.13	CUL9	chr6	protein_coding	cullin 9
novel_IR_13896	chr6	44304321	44304420	-	IntronR	ENST00000244571.4	novel	0.24	9	37.45	y	0.21	4.4	21.18	y	0	0	23.77	n	0.01	0.37	30.79	n	0.0271205	-13.914	down	ENSG00000124608.4	AARS2	chr6	protein_coding	alanyl-tRNA synthetase 2, mitochondrial
novel_IR_13897	chr6	44307394	44310299	-	IntronR	ENST00000244571.4	novel	0.26	5.24	19.87	y	0.27	5.1	18.84	y	0.18	3.49	19.49	n	0.17	4.29	25.43	n	0.00611627	-12.7279	down	ENSG00000124608.4	AARS2	chr6	protein_coding	alanyl-tRNA synthetase 2, mitochondrial
novel_IR_13990	chr7	100201160	100201264	+	IntronR	ENST00000426455.5	novel	0.5	7.83	15.64	n	0.46	6.31	13.84	n	0.67	11.03	16.48	y	0.71	9.52	13.4	y	0.0176614	7.42462	up	ENSG00000066923.17	STAG3	chr7	protein_coding	stromal antigen 3
novel_IR_14046	chr7	100855837	100856868	+	IntronR	ENST00000540482.5	novel	0.26	4.82	18.56	y	0.24	4.25	17.39	y	0.35	5.64	16.19	y	0.38	6.07	15.99	y	0.0329611	6.37905	up	ENSG00000146828.17	SLC12A9	chr7	protein_coding	solute carrier family 12, member 9
novel_IR_14073	chr7	102561220	102562056	+	IntronR	ENST00000341656.4	novel	6.57	0.99	0.15	n	7.65	1.24	0.16	y	2.2	1.17	0.53	n	1	1.58	0	n	0.0213951	-6.82592	down	ENSG00000205238.9	SPDYE2	chr7	protein_coding	speedy/RINGO cell cycle regulator family member E2
novel_IR_14086	chr7	102822203	102854777	-	IntronR	ENST00000455112.6	novel	0.37	0.4	1.06	n	0.27	0.43	1.62	y	1.63	0.54	0.33	n	1.76	0.6	0.34	n	0.00463777	16.767	up	ENSG00000161040.16	FBXL13	chr7	protein_coding	F-box and leucine-rich repeat protein 13
novel_IR_14087	chr7	102822228	102854747	-	IntronR	ENST00000379308.7	novel	0.46	0.4	0.87	n	0.27	0.43	1.58	y	1.99	0.54	0.27	n	2.15	0.6	0.28	n	0.00588613	13.7281	up	ENSG00000161040.16	FBXL13	chr7	protein_coding	F-box and leucine-rich repeat protein 13
novel_IR_14127	chr7	112456086	112456914	+	IntronR	ENST00000429071.5	novel	0.04	1.79	45.59	n	0.02	0.98	40.08	n	0.24	10.79	45.67	y	0.26	9.06	34.5	y	0.00410679	15.5563	up	ENSG00000006652.13	IFRD1	chr7	protein_coding	interferon-related developmental regulator 1
novel_IR_14151	chr7	123510035	123511944	-	IntronR	ENST00000466202.5	novel	0.06	0.15	2.51	n	0.15	0.3	2.05	n	0.55	1.34	2.42	y	0.62	0.82	1.32	y	0.0164302	8.41976	up	ENSG00000164675.10	IQUB	chr7	protein_coding	IQ motif and ubiquitin domain containing
novel_IR_14316	chr7	152136924	152138796	-	IntronR	ENST00000262189.10	novel	0.13	7.26	55.04	n	0.11	6.64	59.17	n	0.22	10.88	49.35	y	0.23	13.53	59.4	y	0.0273751	9.39149	up	ENSG00000055609.17	KMT2C	chr7	protein_coding	lysine (K)-specific methyltransferase 2C
novel_IR_14325	chr7	155204363	155205040	+	IntronR	ENST00000454149.2	novel	1.29	3.09	2.4	n	1.24	2.76	2.24	y	1	0.87	0	n	1.06	1.46	1.38	y	0.0285923	-6.01773	down	ENSG00000228521.2	AC099552.3	chr7	lincRNA		--
novel_IR_14370	chr7	21899448	21899980	+	IntronR	ENST00000620169.4	novel	0.29	1.9	6.47	y	0.37	3.1	8.45	y	0.88	7.89	8.98	y	0.8	4.72	5.93	y	0.0120805	9.01561	up	ENSG00000105877.17	DNAH11	chr7	protein_coding	dynein, axonemal, heavy chain 11
novel_IR_14388	chr7	26364502	26365047	+	IntronR	ENST00000409838.1	novel	0.49	13.24	27.04	y	0.46	9.96	21.59	y	0.66	10.76	16.25	n	0.69	10.28	14.85	n	0.0110636	9.42809	up	ENSG00000086300.15	SNX10	chr7	protein_coding	sorting nexin 10
novel_IR_14397	chr7	27128908	27128969	-	IntronR	ENST00000428284.2	novel	4.54	18.63	4.1	y	4.48	13.6	3.03	y	0.8	1.92	2.39	n	0.22	0.63	2.91	n	0.0439793	-13.7199	down	ENSG00000197576.13	HOXA4	chr7	protein_coding	homeobox A4
novel_IR_14508	chr7	5901704	5902661	+	IntronR	ENST00000325974.8	novel	0.48	2.11	4.43	y	0.44	2.28	5.12	y	0.71	2.27	3.17	n	0.76	4.06	5.33	y	0.0152953	8.58956	up	ENSG00000122674.11	CCZ1	chr7	protein_coding	CCZ1 vacuolar protein trafficking and biogenesis associated homolog (S. cerevisiae)
novel_IR_14543	chr7	66492339	66493216	-	IntronR	ENST00000412091.1	novel	0.76	2.41	3.15	y	0.7	2.98	4.26	n	0.31	1.68	5.43	n	0.35	2.3	6.61	y	0.0127946	-11.094	down	ENSG00000223473.2	GS1-124K5.3	chr7	lincRNA		--
novel_IR_14628	chr7	7640821	7641504	+	IntronR	ENST00000469183.5	novel	0.48	1.23	2.58	n	0.6	2.4	4.03	y	0.02	0.19	7.68	n	0.11	0.8	6.99	n	0.0288433	-6.33333	down	ENSG00000219545.9	UMAD1	chr7	antisense	UBAP1-MVB12-associated (UMA) domain containing 1
novel_IR_14670	chr7	88283168	88283814	-	IntronR	ENST00000414498.1	novel	0	0	4.07	n	0.06	0.16	2.79	n	0.31	0.69	2.23	y	0.41	0.58	1.43	n	0.0458682	5.65945	up	ENSG00000127954.12	STEAP4	chr7	protein_coding	STEAP family member 4
novel_IR_14718	chr7	99454136	99456432	+	IntronR	ENST00000436336.6	novel	0.22	16.07	74.09	y	0.2	13.75	70.09	n	0.33	24.16	72.34	y	0.32	24.65	78.13	y	0.0239816	10.2859	up	ENSG00000160917.14	CPSF4	chr7	protein_coding	cleavage and polyadenylation specific factor 4, 30kDa
novel_IR_14719	chr7	99454136	99456432	+	IntronR	ENST00000451876.5	novel	0.22	16.07	71.98	n	0.2	13.75	68.13	y	0.34	24.16	70.37	n	0.32	24.65	76	n	0.0136061	8.48528	up	ENSG00000160917.14	CPSF4	chr7	protein_coding	cleavage and polyadenylation specific factor 4, 30kDa
novel_IR_14768	chr8	11319838	11322625	+	IntronR	ENST00000221086.7	novel	0.09	1.36	15.2	n	0.13	2.35	18.1	n	0.22	3.5	16.12	y	0.25	4.35	17.19	y	0.0439076	5	up	ENSG00000104643.9	MTMR9	chr8	protein_coding	myotubularin related protein 9
novel_IR_14830	chr8	129840067	129843885	+	IntronR	ENST00000524100.1	novel	10.5	30.2	2.88	y	11.23	30.74	2.74	y	6.42	27.22	4.24	y	6.28	32.1	5.11	y	0.0442064	-12.1485	down	ENSG00000254317.1	RP11-473O4.5	chr8	antisense		--
novel_IR_14862	chr8	143281384	143281482	-	IntronR	ENST00000524335.1	novel	0.8	2.49	3.13	y	0.9	0.89	0.98	n	0.5	1.98	3.98	y	0.45	1.72	3.86	y	0.0445338	-6.7082	down	ENSG00000253716.5	LINC01604	chr8	antisense	long intergenic non-protein coding RNA 1604
novel_IR_14949	chr8	144415419	144415810	-	IntronR	ENST00000301305.7	novel	1.91	5.69	2.98	y	1.8	3.86	2.15	n	1.22	1.2	0.98	n	1.18	2.02	1.71	n	0.0324631	-11.1921	down	ENSG00000147804.9	SLC39A4	chr8	protein_coding	solute carrier family 39 (zinc transporter), member 4
novel_IR_15074	chr8	33500490	33503429	-	IntronR	ENST00000613904.1	novel	0.19	13.01	68.41	n	0.2	11.92	61.1	n	0.24	13.29	55.07	y	0.23	13.91	60.22	y	0.0298575	5.65685	up	ENSG00000129696.12	TTI2	chr8	protein_coding	TELO2 interacting protein 2
novel_IR_15220	chr9	105385502	105438281	+	IntronR	ENST00000374724.1	novel	0.79	3.13	3.97	n	0.73	3.11	4.25	y	0.5	2.99	6	y	0.48	3.15	6.61	y	0.0489844	-8.53815	down	ENSG00000070214.15	SLC44A1	chr9	protein_coding	solute carrier family 44 (choline transporter), member 1
novel_IR_15281	chr9	121573	121961	-	IntronR	ENST00000356521.8	novel	0.45	2.28	5.09	n	0.47	1.84	3.92	y	0.16	0.74	4.67	n	0.14	0.78	5.51	n	0.00207469	-21.9203	down	ENSG00000172785.18	CBWD1	chr9	protein_coding	COBW domain containing 1
novel_IR_15443	chr9	136209275	136211264	-	IntronR	ENST00000358701.9	novel	0.13	14.75	110.35	n	0.14	15.96	112.4	n	0.23	27.03	117.14	y	0.22	27.99	127.81	y	0.00611627	12.7279	up	ENSG00000165661.15	QSOX2	chr9	protein_coding	quiescin Q6 sulfhydryl oxidase 2
novel_IR_15483	chr9	136859317	136859886	+	IntronR	ENST00000317446.6	novel	0.59	18.15	30.53	y	0.62	10.71	17.3	y	0.26	7.74	29.97	n	0.33	10.12	30.97	n	0.040911	-8.141	down	ENSG00000177943.13	MAMDC4	chr9	protein_coding	MAM domain containing 4
novel_IR_15484	chr9	136859317	136859886	+	IntronR	ENST00000445819.5	novel	0.59	18.15	30.53	n	0.62	10.71	17.3	n	0.26	7.74	29.97	n	0.33	10.12	30.97	y	0.040911	-8.141	down	ENSG00000177943.13	MAMDC4	chr9	protein_coding	MAM domain containing 4
novel_IR_15599	chr9	33923293	33923379	-	IntronR	ENST00000379239.8	novel	0.03	1.78	54.47	n	0.06	3.39	52.48	n	0.19	10.79	56.01	n	0.22	11.09	50.02	y	0.0171278	7.54247	up	ENSG00000137073.20	UBAP2	chr9	protein_coding	ubiquitin associated protein 2
novel_IR_16057	chrX	19362850	19369054	-	IntronR	ENST00000338883.8	novel	0.9	2.73	3.03	y	1.18	3.35	2.85	y	2.01	2.55	1.27	y	1.77	2.69	1.52	y	0.0459364	4.60977	up	ENSG00000180815.14	MAP3K15	chrX	protein_coding	mitogen-activated protein kinase kinase kinase 15
novel_IR_16071	chrX	30834763	30835197	+	IntronR	ENST00000428263.1	novel	2.53	5.17	2.04	y	2.33	5.9	2.53	y	0.35	1.97	5.68	y	0.39	1.54	3.97	y	0.0252037	-20.2	down	ENSG00000231542.1	TAB3-AS1	chrX	antisense	TAB3 antisense RNA 1
novel_IR_16097	chrX	47228644	47228731	+	IntronR	ENST00000457458.6	novel	0.06	4.03	72.69	n	0.04	3.88	92.01	n	0.24	16.79	69.16	y	0.23	18.6	81.81	y	0.0119719	16.5469	up	ENSG00000102225.15	CDK16	chrX	protein_coding	cyclin-dependent kinase 16
novel_IR_16122	chrX	48904892	48906392	-	IntronR	ENST00000445167.6	novel	0.4	19.25	48.31	y	0.41	17.74	43.54	y	0.44	22.35	50.54	y	0.45	19.93	44.15	y	0.0298575	5.65685	up	ENSG00000102100.14	SLC35A2	chrX	protein_coding	solute carrier family 35 (UDP-galactose transporter), member A2
novel_IR_16179	chrX	67686126	67694673	+	IntronR	ENST00000504326.5	novel	0.23	0.44	1.91	n	0.19	0.67	3.48	n	0.39	0.96	2.48	y	0.41	1.47	3.56	y	0.0316556	8.49706	up	ENSG00000169083.15	AR	chrX	protein_coding	androgen receptor
